# Supplementary material for: Prevalence of rheumatoid arthritis and diagnostic validity of a prediction score, in patients visiting orthropedic clinics in the Madinah region of Saudi Arabia: a retrospective cross-sectional study
Source: PeerJ. 2022 Nov 15;10:e14362. doi: 10.7717/peerj.14362 (PMC9673770; doi:10.7717/peerj.14362)
Supplement: Supplemental Information 1 [file peerj-10-14362-s001.docx]

**Title: Prevalence of rheumatoid arthritis and diagnostic validity of a prediction score, in patients visiting orthropedic clinics in the Madinah region of Saudi Arabia: A retrospective cross-sectional study**

Shabir Ahmad Mir 1,*, Mamdooh Noor 1, Md Dilshad Manzar 2, Bader Alshehri 1, Mohammed Alaidarous 1, 3, Abdul Aziz Bin Dukhyil 1, Saeed Banawas 1, 3, 4, Yahya Madkhali 1, Sadaf Jahan 1, Faizan Z Kashoo 5, Danish Iqbal 1, Qamar Zia 1, 3, Suliman A Alsagaby1, Sahar ALDosari1

1 Department of Medical Laboratory Sciences, College of Applied Medical Science, Majmaah University, Al Majmaah-11952, Saudi Arabia.

2 Department of Nursing, College of Applied Medical Sciences, Majmaah University, Al Majmaah 11952, Saudi Arabia

3 Health and Basic Sciences Research Center, Majmaah University, Al Majmaah 11952, Saudi Arabia

4 Department of Biomedical Sciences, Oregon State University, Corvallis, OR 97331, USA

5 Department of Physical Therapy and Health Rehabilitation, College of Applied Medical Sciences, Majmaah University, Al Majmaah 11952, Saudi Arabia.

* Corresponding author

Dr Shabir Ahmad Mir, PhD

Assistant Professor

Department of Medical Laboratory Sciences, College of Applied Medical Science, Majmaah University, Saudi Arabia.

Phone: +966536300645, Email: [s.mir@mu.edu.sa](mailto:s.mir@mu.edu.sa)

**Supplement table 1:** Cross tabulation of the index test results (or their distribution)
by the results of the reference standard

|  | | | | | |
| --- | --- | --- | --- | --- | --- |
|  | | | Classification based on the proposed cut-off prediction score | | Total |
| Non-rheumatic | Rheumatoid arthritis |
| clinical diagnosis | Non-rheumatic | Count | 216 | 127 | 343 |
| % within clinical diagnosis | 63.0% | 37.0% | 100.0% |
| Rheumatoid arthritis | Count | 19 | 39 | 58 |
| % within clinical diagnosis | 32.8% | 67.2% | 100.0% |
| Total | | Count | 235 | 166 | 401 |
| % within clinical diagnosis | 58.6% | 41.4% | 100.0% |

Index test results: Classification based on the proposed cut-off prediction score

Reference standard: clinical diagnosis
